# Supplementary material for: Platelet-Rich Plasma Promotes the Proliferation of Human Keratinocytes via a Progression of the Cell Cycle. A Role of Prolidase
Source: PubMed Central journal article supplement (PMC7832888; doi:10.3390/ijms22020936), 2021-01-19
Supplement: ijms-22-00936-s001.pdf [file ijms-22-00936-s001.pdf]

# Supplementary Materials

*Article*

## **Platelet-Rich Plasma Promotes the Proliferation of Human Keratinocytes via a Progression of the Cell Cycle. A Role of Prolidase**

**Magdalena Misiura<sup>1</sup>, Tomasz Guszczyn<sup>2</sup>, Ilona Oscilowska<sup>3</sup>, Weronika Baszanowska<sup>3</sup>, Jerzy Palka<sup>3</sup> and Wojciech Miltyk<sup>1,\*</sup>**

<sup>1</sup> Department of Analysis and Bioanalysis of Medicines, Medical University of Białystok, Kilińskiego 1, 15-089 Białystok, Poland; magdalena.misiura@umb.edu.pl

<sup>2</sup> Department of Pediatric Orthopaedics and Traumatology, Medical University of Białystok, Kilińskiego 1, 15-089 Białystok, Poland; tombial@me.com

<sup>3</sup> Department of Medicinal Chemistry, Medical University of Białystok, Kilińskiego 1, 15-089 Białystok, Poland; ilona.zareba@gmail.com (I.O.); w.baszanowska22@wp.pl (W.B.); pal@umb.edu.pl (J.P.)

\* Correspondence: wojciech.miltyk@umb.edu.pl; Tel.: +48-85-748-5845

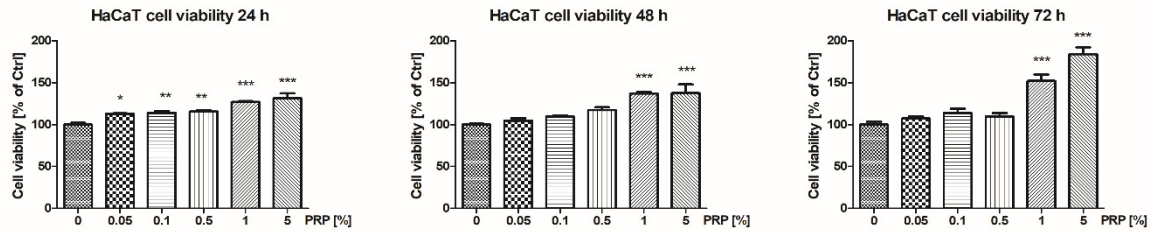

**Figure S1.** Cell viability of PRP-treated HaCaT cells for 24-72 h. Statistical significances were expressed using asterisks such as \* < 0.05, \*\* < 0.01, \*\*\* < 0.001 and \*\*\*\* < 0.0001.

**Table S1.** Basic blood parameters measured in whole blood.

| Parameter | Unit                  | Average | Standard deviation |
|-----------|-----------------------|---------|--------------------|
| WBC       | [10 <sup>3</sup> /μl] | 6,13    | 1,59               |
| RBC       | [10 <sup>6</sup> /μl] | 4,92    | 0,49               |
| HGB       | [g/dl]                | 13,85   | 1,12               |
| HCT       | [%]                   | 39,95   | 5,40               |
| MCV       | [fl]                  | 83,42   | 3,83               |
| MCH       | [pg]                  | 28,19   | 1,24               |
| MCHC      | [g/dl]                | 48,83   | 67,13              |
| PLT       | [10 <sup>3</sup> /μl] | 259,25  | 49,31              |
| RDW-SD    | [fl]                  | 39,00   | 1,70               |
| RDW-CV    | [%]                   | 13,03   | 0,41               |
| MPV       | [fl]                  | 10,44   | 0,76               |
| PCT       | [%]                   | 0,27    | 0,04               |
| PDW       | [fl]                  | 12,29   | 1,49               |
| P-LCR     | [%]                   | 26,94   | 7,68               |

**Table S2.** Basic blood parameters measured in platelet-rich plasma (PRP) fraction.

| Parameter | Unit                  | Average | Standard deviation |
|-----------|-----------------------|---------|--------------------|
| WBC       | [10 <sup>3</sup> /μl] | 9,04    | 6,48               |
| RBC       | [10 <sup>6</sup> /μl] | 1,99    | 2,52               |
| HGB       | [g/dl]                | 5,49    | 6,70               |
| HCT       | [%]                   | 16,54   | 19,50              |
| MCV       | [fl]                  | 87,47   | 5,62               |
| MCH       | [pg]                  | 28,05   | 1,34               |
| MCHC      | [g/dl]                | 32,14   | 1,94               |
| PLT       | [10 <sup>3</sup> /μl] | 906,45  | 474,07             |
| RDW-SD    | [fl]                  | 37,74   | 2,23               |
| RDW-CV    | [%]                   | 12,99   | 1,40               |
| MPV       | [fl]                  | 9,98    | 0,78               |
| PCT       | [%]                   | 0,90    | 0,48               |
| PDW       | [fl]                  | 11,28   | 1,52               |
| P-LCR     | [%]                   | 24,76   | 5,97               |

**Table S3.** The list of primary antibodies used in Western blot and immunocytochemistry.

| Primary antibodies                                        | Dilution | Vendor                    | Techniques         |
|-----------------------------------------------------------|----------|---------------------------|--------------------|
| p44/42 MAPK (ERK1/2) Rabbit mAb                           | 1:1000   | Cell Signaling Technology | Western blot       |
| mTOR Rabbit mAb                                           | 1:1000   | Cell Signaling Technology | Western blot       |
| EGF Receptor Rabbit mAb                                   | 1:1000   | Cell Signaling Technology | Western blot       |
| IGF-1 Receptor $\beta$ Rabbit mAb                         | 1:1000   | Cell Signaling Technology | Western blot       |
| Phospho-EGF Receptor (Tyr1068) Rabbit mAb                 | 1:1000   | Cell Signaling Technology | Western blot       |
| Phospho-p44/42 MAPK (ERK1/2) Rabbit mAb                   | 1:1000   | Cell Signaling Technology | Western blot       |
| FAK Rabbit mAb                                            | 1:1000   | Cell Signaling Technology | Western blot       |
| Phospho-FAK (Tyr397) Rabbit mAb                           | 1:1000   | Cell Signaling Technology | Western blot       |
| Integrin $\beta_1$ Receptor Rabbit mAb                    | 1:2000   | Cell Signaling Technology | Western blot       |
| Akt Rabbit mAb                                            | 1:2000   | Cell Signaling Technology | Western blot       |
| Phospho-Akt (Ser473) Rabbit mAb                           | 1:1000   | Cell Signaling Technology | Western blot       |
| Phospho-mTOR (Ser2448) Rabbit mAb                         | 1:1000   | Cell Signaling Technology | Western blot       |
| PI3 Kinase p85 Rabbit mAb                                 | 1:1000   | Cell Signaling Technology | Western blot       |
| Phospho-PI3 Kinase p85 (Tyr458)/p55 (Tyr199) Antibody     | 1:1000   | Cell Signaling Technology | Western blot       |
| NF- $\kappa$ B p65 Rabbit Antibody                        | 1:1000   | Cell Signaling Technology | Western blot       |
| GAPDH Rabbit mAb                                          | 1:1000   | Cell Signaling Technology | Western blot       |
| Phospho-cdc2 (Tyr15) (10A11) Rabbit mAb                   | 1:1000   | Cell Signaling Technology | Western blot       |
| Cyclin E1 (D7T3U) Rabbit mAb                              | 1:1000   | Cell Signaling Technology | Western blot       |
| Cyclin B1 (D5C10) XP <sup>®</sup> Rabbit mAb              | 1:1000   | Cell Signaling Technology | Western blot       |
| Thymidine Kinase 1 (E2H7Z) Rabbit mAb                     | 1:1000   | Cell Signaling Technology | Western blot       |
| Cyclin A2 (E1D9T) Rabbit mAb                              | 1:1000   | Cell Signaling Technology | Western blot       |
| CDT1 (D10F11) Rabbit mAb                                  | 1:1000   | Cell Signaling Technology | Western blot       |
| IKK $\alpha$ (3G12) Mouse mAb                             | 1:1000   | Cell Signaling Technology | Western blot       |
| IKK $\beta$ (D30C6) Rabbit mAb                            | 1:1000   | Cell Signaling Technology | Western blot       |
| Phospho-IKK $\alpha/\beta$ (Ser176/180) (16A6) Rabbit mAb | 1:1000   | Cell Signaling Technology | Western blot       |
| Phospho-NF- $\kappa$ B p65 (Ser536) (93H1) Rabbit mAb     | 1:1000   | Cell Signaling Technology | Western blot       |
| Phospho-I $\kappa$ B $\alpha$ (Ser32) (14D4) Rabbit mAb   | 1:1000   | Cell Signaling Technology | Western blot       |
| Grb2 Mouse Antibody                                       | 1:500    | Becton Dickin             | Western blot       |
| EGF Receptor Rabbit mAb                                   | 1:500    | Cell Signaling Technology | Immunoflourescence |
| PI3 Kinase p85 Rabbit mAb                                 | 1:100    | Cell Signaling Technology | Immunoflourescence |
| mTOR Rabbit mAb                                           | 1:100    | Cell Signaling Technology | Immunoflourescence |

**Table S4.** The list of secondary antibodies used in Western blot and immunocytochemistry.

| Secondary antibodies                           | Dilution | Vendor                    | Techniques         |
|------------------------------------------------|----------|---------------------------|--------------------|
| Secondary AP-conjugated anti-mouse Antibody    | 1:10000  | Sigma Aldrich             | Western blot       |
| Secondary AP-conjugated anti-rabbit Antibody   | 1:10000  | Cell Signaling Technology | Western blot       |
| Secondary FITC-conjugated anti-rabbit Antibody | 1:500    | Becton Dickinson          | Immunoflourescence |
